# Supplementary material for: A methodological framework for the evaluation of short-range flash-flood hydrometeorological forecasts at the event scale
Source: Copernicus journal article supplement (doi:10.5194/nhess-2022-182), 2022-07-01
Supplement: Supplementary file [file nhess-2022-182-AC3-supplement.pdf]

### **Overview**

The manuscript shares its focus between the verification of accuracy of ensemble precipitation forecasts and different ways to convey (and analyse) the information provided in terms of discharge forecast by a meteo-hydrological forecasting chain. On the one hand, the theme of forecasting severe rainfall events is largely discussed in the introduction, but a in-depth analysis on the verification of output by NWP models (and related ensembles) is neglected. On the other hand, it is declared that a new framework for the evaluation of meteo-hydrological model coupling is proposed, but a proper review of past studies about this issue is not provided in the introduction and the proposed analysis recalls (and put together) different approaches commonly used in the operational practice of worldwide flood forecasting centers. In addition, many parts of the proposed evaluation framework appears as unsuitable for real-time applications. The overall feeling about the present manuscript is that it describes a very detailed post-event analysis, where the parts of novelty and originality do not clearly stand out. A clear choice about the main goal of the study should be taken and then properly developed. In my opinion, the strong point of the paper should be the availability of three meteorological ensemble products (even though it is not clear if a performance comparison for these ensembles is a novelty or past studies have already investigated the subject). The performance evaluations in terms of Quantitative Precipitation Forecasts (QPFs) should be based on a larger dataset and taking into consideration the concept of “fuzzy verification”. The analysis of outcomes provided by a meteo-hydrological model chain driven by the available ensemble QPFs is an added value for the study.

We thank referee n°3 for the feedback, showing that the objectives of the paper were probably not presented sufficiently clearly. We managed to improve this in the revised version of the manuscript (which is already available, see our detailed answers hereafter describing the modifications introduced). The main misleading point was probably that the article does not aim at evaluating QPFs per se, but rather the performance of flood forecasts obtained by using these QPFs as input of rainfall-runoff models. The initial analysis of QPFs (section 4.1) is only meant to provide the required background information for the analysis of flood forecasts (sections 4.2 and 4.3): i.e. to check that the QPFs are of reasonable quality. The presented assessment method can only be implemented a posteriori and not in real time. It aims to provide a first detailed and informative diagnosis of the performance of flood forecasts, for single major flood events where such forecasts are needed. Moreover, an immediate post-event analysis is often needed to understand better what went right or wrong during the flood forecasting and response. This paper aims at serving such a purpose.

### **General comments**

1. The main declared aim of the manuscript is to presents a methodological framework for the event-based evaluation of ensemble forecasts for floods, with respect to the needs of civil protection authorities. But, the proposed analysis is quite complex (several aspects and score to consider), maybe not suitable to the real-time operational practice of flood forecasting centers. The current contents of Section 4 sound more like a post-event analysis. In addition, the use of verification metrics like rank diagrams and ROC curves to analyze a single event has poor significance (Figs. 7 and 8). These metrics are commonly used over large datasets, in order to highlight statistical characteristics of the forecast product. The computation over a single event could be of some interest if compared to “historical” performances based on a long archive (for instance, for real time applications, the spread skill relationship in Figs. 11-16 does not add significant information with respect to the issue of warnings and outcomes shown in the remaining panels).

The statistical analysis in terms of discharge forecast should consider the whole period covered by QPFs (not just a flood event).

The proposed evaluation is aimed at post-event analyses. Providing a real-time assessment is clearly not the objective of this paper. The aim is to provide an evaluation, after the event, including meaningful information for the users of hydrological forecasts. Providing assessments of the capacity to anticipate discharge thresholds, which may correspond locally to damage thresholds, and hence to decisions and actions of emergency services (not only flood forecasters) is essential to evaluate the usefulness of hydrometeorological forecasts for improved event management. Even if the proposed assessment is event specific and cannot be fully extrapolated to future events, each event being specific, drawing

lessons from each specific flood event appears essential to us. This objective was discussed with the French operational flood forecasting service (SCHAPI), which was directly involved in the research project hosting this work (PICS project).

Building an evaluation based on a large historical period of forecasts, or numerous flood events, would certainly be much more robust for an in-depth analysis of any systematic errors of a flood forecasting system. But unfortunately, this is often not possible, particularly when dealing with extreme flash floods. The reasons for this are detailed in the introduction (3rd paragraph): we are dealing here with experimental rainfall forecast products based on recent evolutions of NWP models, and which were not released for a long historical period. This is often the case when dealing with flash-flood forecasting. Additionally, our objective is to evaluate hydrological flood forecasts and not QPFs. From this point of view (flood forecasting), extending the analysis to a long period of low flows would not be relevant. Thus, the analysis has to be focused on the (rare) periods of floods. This is precisely the novelty of this paper, which adapts some conventional evaluation metrics to provide a first evaluation in the specific context where only some few relevant flood events have been observed and documented. For this purpose, we propose to exchange time for space by examining flood forecasts at numerous basins outlets (1174 outlets based on the highly distributed Cinecar rainfall-runoff model).

We modified the introduction to state more clearly that we propose here a post event analysis methodology, focused on flood forecasting evaluation, and aiming at providing a first useful analysis even if not fully comprehensive yet since only one event can be analyzed.

The coupling with a hydrological model represents a complementary tool for the verification of QPFs (since catchments can be seen as macro-raingauges with variable interception areas), given that the intermittence of the rainfall signal is dampened by the non-linearity in rainfall-runoff processes. In particular, the dynamics of the overall soil filling and depletion mechanisms and the flood routing play a fundamental role in determining results, as well as the role of the morphology of the basin that determines the time-space scale below which the variability of the rainfall field is dumped. The spatial integrating effect of a watershed filters out some of the spatial and temporal variability that complicate the point-by-point verifications that are more commonly used (Benoit et al., 2000).

Yes, indeed, the coupling with rainfall-runoff models is the key point of this paper. Our objective is to evaluate a hydrometeorological forecasting chain, and a standard evaluation of QPFs would not be satisfactory from this perspective, for the reasons mentioned by the reviewer.

2. The proposed evaluation of rainfall forecast is aimed to take into account spatial and temporal variability. The proposed analysis recalls in a some way the concept of the so-called “double-penalty effect” (i.e., the fuzzy verification introduced by Ebert, 2008 and Roberts and Lean, 2008, and discussed by Schwartz and Sobash, 2017). But the subject is treated neglecting specific past literature about this issue. Introduction and Section 4.1 should be revised accordingly.

Why has just one year of ensemble forecasts been used, given that products are available from 2018?

Thank you for having drawn our attention to these interesting references dealing with the evaluation of high resolution gridded rainfall forecasts. Since the objective of the paper is to evaluate flood forecasts, the literature review has not been focused on the evaluation of gridded rainfall products. The evaluation of flood forecasts can nevertheless be seen as a form of fuzzy verification of gridded rainfall products, taking account for the averaging effect and the non-linearity of the rainfall-runoff process, and also for the watersheds limits (which, unfortunately, are not fuzzy). We added a sentence in the introduction section to remind this possible link between flood forecasting verification and the concept of fuzzy verification of QPFs: "In one sense, flood forecasting verification can be seen as a form of fuzzy verification of rainfall forecasts (Ebert, 2008; Robert and Lean, 2008) accounting for the averaging effect and the non-linearity of the rainfall-runoff process, and also for the positions of watershed limits".

Regarding section 4.1, the objective of this section is mainly to prepare the evaluation of flood forecasts and not to provide a comprehensive evaluation of gridded QPFs. The concept of fuzzy verification could probably be applied to the rank diagrams (by building the diagrams on averaged values at different resolutions), but we consider this is out of scope of this paper.

Since some of the rainfall products are experimental, they were not released yet for the years following 2018. Extending the evaluation period would have been interesting if other significant FF events had hit the Aude catchment after 2018, with peak discharges exceeding the 10-year return period threshold. Unfortunately, this is not the case yet.

3. AROME-EPS and AROME-NWC with time lagging are merged to build an ensemble. Which are the reasons to merge the two products? Why is AROME-NWC with time lagging just used to build an ensemble?  
 AROME-EPS is an operational ensemble forecast product for short-range forecasting (0-45 h). AROME-NWP is an operational deterministic forecast product, specifically designed for very short lead times (0-6 h), which takes into account the latest radar observations. We are dealing here with short range nowcasting of flash-floods, and the AROME-NWP model appears well suited to this application. This is at the origin of the idea of merging both models to build an ensemble suited to very short lead times (0-6h).
4. The reasons for using two different hydrological models for different aims should be discussed.  
 We propose to add the following paragraph in the section "3.4 Rainfall-runoff models" : "The objective of this study is not to compare the rainfall-runoff models. Since the RS hydrographs (hydrographs simulated with Antilope rainfall observations) are systematically used as reference for the evaluation of the flood forecasts, the evaluation results should not be directly dependent on the rainfall-runoff model but rather on the nature of the rainfall forecasts used as input. The interest of using two models here is mainly to strengthen the evaluation, by involving two complementary models in terms of resolution and calibration approach: a) because of its high spatial resolution, the Cinecar models helps to extend the evaluation of discharge threshold anticipation to small ungauged catchments, b) because it was not specifically calibrated on the 2018 event (calibration on the whole 2008-2018 period), the GRSDi models offers an evaluation of the total forecast errors at gauged outlets, including both the rainfall forecasts errors and the rainfall-runoff modeling errors. This is achieved by the comparison of flood forecasts with both RS hydrographs and observed hydrographs. However, the proposed evaluation framework could also be applied by using one unique rainfall runoff model."
5. Contents of Section 4.3 should be reformulated taking into account the response times of the considered catchments. Outcomes depends concurrently by the accuracy of rainfall forecast for the event study as well as by the characteristic of the basin.  
 The response times are already taken into account based on the anticipation times obtained for the RF0 forecasts in section 4.2. These anticipation times are provided at the beginning of section 4.3 for outlet 3 to 6. According to these anticipation times, only the hydrographs presented for outlets 5 and 6 seem to be significantly influenced by the propagation times. This possible influence is mentioned in the text (see our answers to the specific comments).

### Specific comments

- Line 7: “peak flood” in place of “flood rising limb”, given that the statistical analysis is focused on the maximum value of the discharge forecast  
 We just mean here that the analysis considers forecasts issued before and during the flood rising limb. We reformulated the sentence in the following way: "The anticipation of the flood rising limb (discharge thresholds) is then analyzed, using .."
- Lines 15-17: this statement is questionable due to the limited dataset; results do not support “to draw robust conclusions”. A reformulation needs.  
 We changed the formulation to: "to draw first conclusions".
- Lines 69-72: this content (i.e., point i) ) recalls what has mainly been done in this manuscript  
 We agree. The evaluation does not solve the question of statistical representativity, which is probably impossible based on a single event. This limitation is explicitly reminded in the conclusion of the paper (last paragraph). The added value of the approach is rather related to the two other points (ii and iii): detailed illustration of internal variability of forecast performance, including the case of ungauged basin outlets.
- Lines 72-73: this content (i.e., point ii) ) is questionable by the light of general comment 2)  
 As mentioned in the answer to comment 2, we are dealing here with flood forecasts which are already averaging the gridded rainfall forecasts, and can be seen as a form of fuzzy verification. However, this concept of fuzzy verification can

hardly be further extended to flood forecasting in our opinion, since the watershed limits are not fuzzy, and the floods should be forecasted on the right rivers (not on the neighboring rivers). It is therefore important for flood forecasting applications to illustrate the performances of forecasts along all the branches of the river network, particularly in the case of flash floods occurring on small ungauged rivers.

- Lines 89-91: this content should be revised taking into account the general comment 2).  
See our answer to the general comment 2 and to the former remark. We are dealing here with flood forecasts, and the objective is not to evaluate directly the gridded QPFs. The initial analysis of rainfall forecasts is just here to prepare the evaluation of flood forecasts.
- Lines 119-121: this subject should be deeper investigated in the introduction.  
The introduction has been modified to better highlight this objective.
- Lines 130-132: this subject should be deeper investigated taking into consideration the concept of fuzzy verification  
See our answer to general comment 2. The objective of this first step is not to provide a comprehensive evaluation of QPFs, but just to prepare the evaluation of flood forecasts. The possible link between flood forecasts evaluation and the concept of fuzzy verification of QPFs has been presented in the introduction.
- Lines 133- 153: the proposed analysis and metrics fits well for a post-event analysis, but they are not suitable for real time operational practices, with respect to the point of view of end-users.  
This is completely right, the evaluation framework corresponds to a post-event analysis. We think nevertheless that this kind of post-event evaluation could be very useful to end users to get aware about the possible limits of the flood forecasts and to learn how to efficiently use them (see our answer to general comment 1). Fortunately, end-users have also time to get prepared during the periods of low flows.
- Lines 145-146: this statement is questionable, given that an evaluation of performance based on the last hours is not indicative about the performance of hourly QPF in the following future time-steps  
From our point of view, the text clearly indicates here that the rank diagrams are computed for the whole HFT (i.e. the whole intense period of the event), and not only on the last hours in a real time situation. We are not dealing here with a real time analysis.
- Lines 147-153: the use of rank diagrams to analyse a single event appears as no fully proper  
The number of forecast-observation pairs used to compute the rank diagrams is 551.088, which is enough to visualize if the ensemble forecasts have significant biases and excessive or insufficient spread. One should keep in mind, however, that since the verification is performed on a rather short period and small area, the displayed rank diagrams are only used to qualify the ensemble behavior in our case study, and should not be interpreted as indicative of the long-term average performance of ensemble forecasts.
- Lines 157-162: these contents can be simply summarized by stating that the forecast is verified within a time window useful for the aims of end-users (warning issues)  
We agree and thank the reviewer for the comment. We think it is however also important to mention that the different forecasts issued during this time window are aggregated and considered together to fill the contingency table. We propose the following modifications : "The evaluation is essentially based on a classical contingency table approach, with some adaptations aiming to focus the analysis on the most critical time window from a user perspective (time steps preceding the threshold exceedance), and to aggregate the forecasts issued during this time window, independently of the lead-times (see Appendix A for a detailed description of the implemented method)."
- Line 164: how is the 10-yr return period computed for the ungauged basins?  
The 10-year return period discharge threshold is derived from the SHYREG database, which includes flood discharge quantiles at the outlets of ungauged catchments, for different durations and return periods ranging from 2 to 1000 years (Aubert, 2014). This origin of the 10-year thresholds is detailed in Appendix A and in the section on anticipation 4.2. A reference to Aubert et al. has been added here.

- Lines 215-222: the use of observations which were not available in real time to calibrate the hydrological models limits the operational use of the proposed forecasting chain. As well as the peak discharges estimated at ungauged locations during a post-flood field campaign, makes impossible to replicate the proposed framework for real time applications. This is right, the evaluation procedure is not designed for a real time application, but for a post-event evaluation. This offers the opportunity to involve additional data (such as post-flood field data) and models.
- Line 233: if AROME-EPS is updated every 6 hours, it is not clear how figs 5, 6, 7, 11-16, B1-B6 show continuous hourly forecast with 1 to 6 hour lead times for each hourly time step.  
A new hydrological ensemble forecast is built every hour by forcing the rainfall runoff model with the last available ANTILOPE QPEs, and the QPFs from the last AROME-EPS run for the next time steps. This means that the first time steps of the AROME-EPS runs are not systematically considered. A sentence has been added in section 4.2 to provide this explanation: "Forecasts are issued every hour, by using the ANTILOPE rainfall up to the time of forecast, and one of the 3 rainfall forecast ensembles, or a zero future rainfall scenario (RF0), for the 6 next hours."
- Line 245: "an ideal distance for the present case study" fits better than "an ideal distance".  
This has been modified.
- Lines 248-253: is this comparison a novelty with respect to past literature? Why the 1-h lead time is not considered to build Fig.3? Additional rainfall accumulations larger than 5 mm/h should be considered to complete Fig.3.  
This figure corresponds to a former evaluation of QPFs at larger temporal and spatial scales, and for a relatively low threshold of rainfall intensity (5 mm/h). It is therefore not completely in line with the objectives of the paper. We propose to remove this figure.
- Line 257: the description of the use of each model within the present study should be here introduced.  
We added a specific development in section 3.4 to better justify the use of each model (see our answer to general comment 4).
- Line 270: specify the periods of the calibration and validation processes  
The GRSDi model was calibrated for the period between October 2008 and October 2018, including the Aude's event. This has been performed at the calibration outlets shown in Figure 4. Validation was performed spatially, which means that the model was validated for the same time period but at the outlets not used for calibration. We slightly adapted the text to mention that the calibration and validation periods are the same.
- Line 271: define the acronym KGE  
We modified it and added a reference describing the KGE score.
- Line 281: specify the time step at which this model runs  
The model runs at 15 min time-step. We added this information in the text.
- Line 291: specify in the text the period of the temporal evolution; what does J+1 mean?  
The temporal evolution shown in figure 5 is drawn from the 14<sup>th</sup> October 07:00 to the 15<sup>th</sup> October 19:00. We specified this in the text. ANTILOPE J+1 corresponds to the QPEs obtained with the ANTILOPE algorithm (Laurantin et al, 2008) readjusted with the radar and rain gauge observations available the following day (J+1). This explanation has been added in section 3.2.
- Line 292: the 1-h lead-time has poor significance for the aims of end-users (i.e., warning issues). The 3-h lead time is more significant.  
Since we are dealing here with many upstream ungauged watersheds, a 1-h lead-time often exceeds the catchment response times. This is illustrated by figure 10, which shows that the anticipation times of the 10-year discharge threshold rarely exceed 1 hour based on the RF0 forecast (zero future rainfall): out of 467 sub-basins for which the threshold is exceeded by the RS scenario, the anticipation times are < 15 min for ≈230 sub-basins (misses) and in the [15 min, 1 hour] range for ≈185 other sub-basins. Considering this, we think that a 1 hour lead-time is already significant for such basins, even if we agree that 3 hours lead times would be preferable for end users but difficult to achieve.

- Caption Fig.4: define the acronym Hymex (or avoid to use it in the caption)  
We added the meaning of the HyMeX acronym in the caption. It is also defined in the text, before the description of Figure 4 (l. 220-222).
- Line 304: it is not clear to what “rising limb” is referred  
We modified the sentence to make it clearer: “.. a time-shift of 2 hours is observed during the rising phase of the hyetograph”.
- Lines 305-309: for certain selected outlets, hyetographs for 6-h rainfall amount (for a fixed or moving average time window) should be also useful to evaluate the impact of rainfall forecast on the hydrological forecast, due to the integrating effect of the spatial-temporal variability of rainfall by the rainfall-runoff processes  
A 6-hour rainfall accumulation would have the advantage to combine all the lead times. But since we are dealing with flash floods on upstream basins, a 6-h time step probably exceeds the typical response times of a large part of the considered basins. This is confirmed by the anticipation times obtained on Figure 10 for the RF0 scenario (no future rainfall). We think a 1-hour accumulation is more representative of the average response times of the considered basins.
- Lines 312-315: this statement is questionable, given that, in real-time, it is not known which areas will not contribute, even if a nowcasting forecast is available. The different scales involved between model predictions and raingauge measures, coupled with the high variability of the physical events and of the model errors, complicate the use of precipitation observations for atmospheric model validation, particularly in complex terrain endowed with a limited density of instruments. This areal variability enables to diagnose different problems associated with the atmospheric simulations, such as the quality of the larger scales simulated or the reliability of the description of small scale processes. The dependence between basins and sub-basins can be very useful to understand the possible problems of spatial shifting in the modelled atmosphere (Benoit et al., 2000; Jasper and Kaufmann, 2003).  
We are not dealing here with a real time analysis, but post-event evaluation. We also benefit from a post event radar rainfall reanalysis. Therefore, the areas where significant rainfall was neither observed nor forecasted are known, which is a much more comfortable situation for the evaluation of forecasts.
- Line 319: the 1-h lead-time has poor significance for the aims of warning issues (observed rainfall plays the major role in the modelled basin response for this lead time). The 6-h lead time is more significant.  
Since we are dealing with flash-floods and basins of limited areas, the observed rainfall does not necessarily play a dominant role even for a 1-hour lead time. This is confirmed by figure 10: the anticipation times rarely exceed 1 hour for the RF0 scenario (zero future rainfall).
- Line 332: the comment for line 319 is valid also here  
See our answer to the former comment.
- Caption Fig.6: “amount” in place of “rates”  
This has been corrected.
- Lines 345-350: these considerations should be done on the discharge ensemble (not on the ensemble QPFs), due to the non-linearity in rainfall-runoff processes  
This section has been largely modified, and these statements have been moderated.
- Line 360: which is the need to run the model at 15-min time resolution?  
The Cinecar models runs at a 15-min time step, which is well suited for the representation of the very fast dynamics of flash floods.
- Lines 364-365: how is the 10-yr return period computed for all the sub-basins (I guess that many of them are ungauged basins)?  
The 10-year return period discharge threshold is derived from the SHYREG database, which provides a regionalization of flood discharge quantiles at the outlets of ungauged catchments. The peak discharge quantiles are estimated for return periods between 2 and 1000 years (Aubert, 2014). This explanation has been added in the text.



- Line 370: which hydrological runs were used to built Fig.8?  
The hydrological runs and the method used to build the contingency table are described in 1.356-369 (initial version of the manuscript) and in appendix A. The hydrological forecasts were obtained with the Cinecar model, and the contingency tables were built based on an adapted approach to combine the forecasts issued in the 6-hours preceding the "critical" times to be detected (threshold exceedances). A sentence has been added here to remind that the forecasts are issued every hour.
- Caption Fig.8: specify what represent the points on each line  
The points represent the scores obtained for each percentile of the hydrological forecasts, from 5% to 95%. We added an explanation in the caption.
- Line 372: which is the starting time of RFO? How long is the RFO run driven by observed rainfall before the rainfall is set to zero?  
As for the other forecasts, a RF0 forecast is issued every hour from the 14<sup>th</sup> October 07:00 to the 15<sup>th</sup> October 19:00. The observed rainfall Antilope J+1 is used from the initialization of the model (14<sup>th</sup> October 07:00) up to the forecast time, and 0 rainfall values are then used up to the 6-hour lead time. The following explanation has been added to explain how the different forecasts are issued: "The model is run from the 14<sup>th</sup> October 07:00 and hourly rainfall accumulations are uniformly disaggregated to fit the 15-min time resolution of the model. The forecasts are issued every hour, by using the ANTILOPE rainfall up to the time of forecast, and one of the 3 rainfall forecast ensembles, or a zero future rainfall scenario (RF0), for the 6 next hours."
- Lines 376-377: specify in the text the number of missed detections (as done for false alarms at line 379)  
We added the number of misses in the text.
- Line 381: "contrasted effects" is not clear to what refers to.  
We modified the sentence in the following way: ".. the effects of the spatial perturbation introduced by the pertDpepi ensemble differ depending on the area and ensemble percentile considered."
- Lines 383-386: these considerations could be misleading (the non-linearity in rainfall-runoff processes plays a major role; it is not an effect of what percentile to consider)  
The explanation provided to the reduction of False Alarms with PertDpepi seems the most plausible to us, but we agree that other explanations could be advanced (such as a temporal shift with PertDpepi in this area). We moderated this sentence to be less affirmative.
- Caption Fig.8: are river gauge level available every 15 minutes? How can hits be computed everywhere with a 15-min time step?  
We are dealing here with flash-floods in small and mostly ungauged river basins. Streamgauges are only rarely available. Thus, as explained in sections 2.2 and 4.2, and in Annex A, the simulated hydrographs obtained with the rainfall-runoff model and the observed rainfall (Antilope J+1) are considered as the reference to compute the scores. This leads to neglect the rainfall runoff modeling errors and to focus the analysis on the propagation of rainfall forecasts errors.
- Line 388: "rainfall forecast products" in place of "ensemble rainfall forecast products" (given the general validity of the sentence)  
We modified this.
- Lines 390-392: the impact of RFO depends on the concentration time (i.e., the response time of the watershed to the rainfall) of the considered basins. Related false alarms decrease with the lead-time increasing (except for systematic errors in the hydrological simulation).  
We agree that the anticipation with RF0 mainly depends on the response time of the considered basins, and the risks of false alarms for the hydrological forecast ensembles decrease with the increase of the response times. As illustrated by figure 10 (anticipation time with RF0), the response times are very limited for a large majority of river basins, which probably explains the high number of false alarms.

- Fig. 10: in the labels, the word “Ensemble” is not clear to what refer to  
We modified the label.
- Line 394: false alarms and misses should be also evaluated as function of different anticipation times  
As mentioned in appendix A, the anticipation times are computed by pooling together all the forecast lead times. This is the reason why all the forecasts can be summarized in a unique ROC curve (Fig.8) or anticipation map (Fig.9), or histogram of anticipation times. The advantage of this procedure is to provide a very synthetic view of the anticipation capacity. The results could alternatively be examined for fixed forecast lead-times, which would be much more conventional. In this case, we would obtain 6 different ROC curves and anticipation maps, and the comparison of anticipation times would not be possible in the same way as we did here (fig. 10).
- Lines 403-406: the question is doubtful, given that the concentration time strongly influences outcomes and the corresponding evaluation.  
We agree that the increase in anticipation times and the related risks of false alarms are probably lower for basins with large response times. However, according to figure 10, we think there is no doubt possible for basins considered here, which are mostly very small upstream basins with very limited response times. Figure 10 shows that anticipation times are significantly larger with the hydrological ensemble forecasts, but that an important number of false alarms appears in this case.
- Lines 409-414: which is the sense of the analysis in terms of PC? Is PC computed in the same way used for scores shown in Fig.9?  
Yes, the PC score is calculated from the same contingency tables as the ROC curves presented in Figure 9. We added an explanation for this in the text. The PC is a just way to summarize the contingency table obtained for each percentile of the ensemble forecasts. It allows having a unique score for each forecast product and each ensemble percentile.
- Lines 416-419: this sentence highlights the limit of the present manuscript, given that the proposed framework cannot be applied in real-time  
The objective is not here to provide a real-time evaluation, but a meaningful post event analysis (see our answer to general comment n°1). This sentence was written to highlight the importance of accounting for the relative benefits of increased anticipation and losses related with false alarms, before concluding about the actual usefulness of forecasts for an end-user. The sentence has been reformulated to better illustrate this idea.
- Lines 419-421: this statement has no sense (with respect the aims of flood warning). The accuracy of the rainfall forecast influences the quality of the hydrological forecast, but the use of RFO cannot be considered an alternative solution.  
We understand the remark. We don't mean here the RFO scenario should be considered as an alternative solution, but just as an interesting reference for the evaluation of flood forecasts derived from rainfall ensemble forecasts. Depending on the response times of the considered basins, the RFO scenario may sometimes offer a significant anticipation of discharge threshold exceedances. Therefore, using RFO as reference helps to measure the actual gains in anticipation related to the use of rainfall forecasts. Moreover, by definition, the RFO forecasts avoid false alarms, and thus helps in measuring the corresponding limits of the flood forecasts based on rainfall ensembles (generation of false alarms which can be very penalizing in real world situations).
- Line 425: quantify the size of the catchments related to outlets 1 and 2  
The drainage areas have been added in the caption of Figures 11 and 12.
- Line 426: have outlets 1 and 2 weak reaction to rainfall in general or just for this event?  
The weak reaction is only due to the limited rainfall accumulation observed for this event.
- Line 429: quantify the size of the catchments related to outlets 3 and 4  
The drainage areas have been added in the caption of Figures 13 and 14.
- Line 432: quantify the size of the catchments related to outlets 5 and 6  
The drainage areas have been added in the caption of Figures 15 and 16.



- Line 441: briefly recall the definition of the spread/skill score and specify if it is referred to rainfall or discharge forecast  
Spread-skill scores are computed for discharge forecasts. This has been mentioned in the text, and a short definition of the spread/skill score has also been added (section 2.3).
- Line 443: the choice of the lead-time should be appropriate to the concentration time of the investigated catchment to analyze outcomes. Otherwise, the outcomes seems to depend on the lead time of rainfall forecast  
The lead time selected of 3 hours selected here exceeds the response times of a large majority of the selected sub basins (see the anticipation times obtained for RF0 on Figure 10). However, since we are dealing with short range nowcasting products limited to a maximum of 6 hours lead time, it is not always possible to extend the lead time beyond the response time of the considered basins. Thus, we preferred here to fix the lead time and illustrate the effect for basins of different sizes.
- Line 445: wrong label for the outlet number in Figs of appendix B (outlet 4 for all the graphs)  
This has been modified.
- Lines 462-465: maybe, the outcome is affected by a spatial scale of the shift which is not optimal for the investigated catchment  
Good point, we added a sentence to mention this: ".. highlighting an excess of spread in this ensemble product. It might be caused by an excessive spatial shift with respect to the geographical size of the investigated catchment."
- Line 471: which is the concentration time for these outlets?  
The anticipation times obtained for outlets 3, 4, 5, 6 with the RF0 forecast (figure 10 of section 4.2) are indicated in the first paragraph of section 4.3. These anticipation times directly reflect the lead times up to which a good forecast can be obtained without rainfall forecasts. The concentration times are more difficult to determine and would be less informative about the possible forecast lead times.
- Line 481: typing error  
Thank you, this has been corrected.
- Line 495: this outcome is likely influenced by the concentration time of investigated outlets  
Outlet 3 and 4 are upstream outlets for which the anticipation times with the RF0 forecast are very limited: respectively 15 min and 0 min (miss). This traduces very short response times to rainfall and concentration times. Therefore, we don't think that the shape of the presented forecast hydrographs for a 3-hour lead time should be highly influenced by the concentration.
- Fig.14: in all the graphs, move the legend panel in order to do not cover lines of results  
The legends have been moved in order to avoid any covering of the displayed information.
- Lines 525-527: the reasons for this outcome are the same cited at line 514 (influence of the concentration time of investigated outlets). Reformulate the sentence.  
  
This paragraph compares the simulated and forecast hydrographs to the actually observed hydrograph, to reveal the relative importance of the rainfall-runoff modeling errors and the rainfall forecast errors. As you mention, the influence of the propagation times on the spread of the forecast has already been mentioned at line 514. The novelty here is just that the rainfall runoff modeling errors are also visible. The sentence has been reformulated to better highlight this point.
- Fig.16: in the graphs b) and c) move the legend panel in order to do not cover lines of results  
As for figure 14, the legends have been moved in order to avoid any covering of the displayed information.
- Lines 548-554: a map displaying concentration times of investigated outlets satisfy the need. The threshold anticipation maps in Fig.9 describe just a case study related to the specific case study and forecast products. It cannot be used in general terms for flood warning purposes.

The anticipation times obtained for the RF0 forecast appear much easier to obtain to us, and directly traduce the specific features of the event. Concentration times would be more subjective and difficult to assess, and they cannot reflect a generic behavior of each basin, since they neglect the variations of basin dynamics due to the spatial variability of rainfall and to the intensity of the flood event.

We agree that the anticipation maps, as well as all the results presented in this paper, are event specific. This is precisely the aim of this paper, to provide an in deep analysis of the forecasts issued for one single event.

We don't see here any statement suggesting that these maps should directly be used for warning purposes. They just help to analyze some advantages/limitations of the forecasts issued during the studied event, and the links with the rainfall forecast products used as input of the chain.

- Lines 557-561: the meaning of “anticipation time” may be misunderstood. It derives by a combined effect of accuracy of currents forecast and response time of the investigated outlet.  
The notion of Anticipation Time has a specific definition here, which is provided in the description of the methodology (Appendix A). We reminded this definition directly in the text of section 4.2 to avoid misunderstanding: "Note that the anticipation time is defined as the difference between the time of exceedance of the discharge threshold by the RS hydrograph and the time of the first run of forecast that detects the threshold exceedance (see Appendix A)".
- Lines 575-579: this analysis is significant when performed over a long dataset  
We agree, but unfortunately the analysis on a long dataset cannot be performed for these products (see answer to general comment 1).
- Lines 584-595: the sense of these considerations is related to the role of QPFs in general, not specifically to ensembles.  
We agree this corresponds to the general gains expected by using deterministic or ensemble QPFs. However, these effects are observed only if the QPFs are good enough, which is unfortunately not systematically the case yet for major flash floods events with huge spatio-temporal variability.
- Lines 596-601: the gain is due to NWC. Which is the added value to use NWC+EPS rather than just NWC? NWC alone was not considered in this work because there is no simple way to generate an ensemble forecast from it with a reasonable size (>5). The generation of ensembles from NWC forecasts is a complex topic which will be considered in a future study.
- Lines 619-621: maybe, the extension of 20 km is not the optimal dimension for the investigated case study. An investigation about this issue is worth to be performed.  
This comment pertains to the description of the pertDpepi method (lines 241-247). The following development has been added in this section : "The shift scale of 20 km represents a typical forecast location error scale: according to Vincendon et al. (2011), 80% of location errors are less than 50 km. The value of 20 km has been empirically tuned to produce the largest possible ensemble spread on a set of similarly intense precipitation cases, without noticeably degrading the ensemble predictive value as measured by user-oriented scores such as the area under the ROC curve."
- Line 639: have authors considered to apply spatial perturbations just to NWC members?  
See the response to comment about lines 596-601 above: the generation of an ensemble from NWC alone is an interesting option, but it is outside the scope of this study. It could conceivably lead to a better ensemble than using EPS, but more work would be needed to reach this goal.
- Lines 727-728: these contents may be misleading. The outcome depends specifically on the accuracy of the ensemble for the case study. It is not an information that can be estimated a priori by means of a statistical analysis and generally related to the lead time. It is strictly related to the investigated event and selected run of the ensemble. These contents can be referred just to a post-event analysis (and cannot be inferred for real-time operational practices).  
We agree, the anticipation times computed here are event specific and just provide an in deep-post event analysis (see our response to general comment 1).

## References used in the review comment

- Benoit R, Pellerin P, Kouwen N, Ritchie H, Donaldson N, Joe P, Soulis E (2000) Toward the use of coupled atmospheric and hydrologic models at regional scale. *Mon Wea Rev* 128: 1681–1706
- Ebert, 2008: Fuzzy verification of high resolution gridded forecasts: A review and proposed framework. *Meteor. Appl.*, 15, 51–64, doi:10.1002/met.25
- Fortin, V., Abaza, M., Anctil, F., and Turcotte, R. (2014). Why should ensemble spread match the RMSE of the ensemble mean?. *Journal of Hydrometeorology*, 15(4), 1708-1713
- Jasper K, Kaufmann P (2003) Coupled runoff simulations as validation tools for atmospheric models at the regional scale. *Q J R Meteorol Soc* 129: 673–693
- Roberts, N. M., and H. W. Lean, 2008: Scale-selective verification of rainfall accumulations from high-resolution forecasts of convective events. *Mon. Wea. Rev.*, 136, 78–97, doi:10.1175/2007MWR2123.1
- Schwartz, C. S. and Sobash, R. A.: Generating probabilistic forecasts from convection-allowing ensembles using neighborhood approaches: A review and recommendations, *Mon. Weather Rev.*, 145, 3397–3418, <https://doi.org/10.1175/MWR-D-16-0400.1>, 2017.
